# Supplementary material
Source: PubMed Central journal article supplement (PMC2693453)
Supplement: NIHMS81940-supplement-Supp__data.pdf [file NIHMS81940-supplement-Supp__data.pdf]

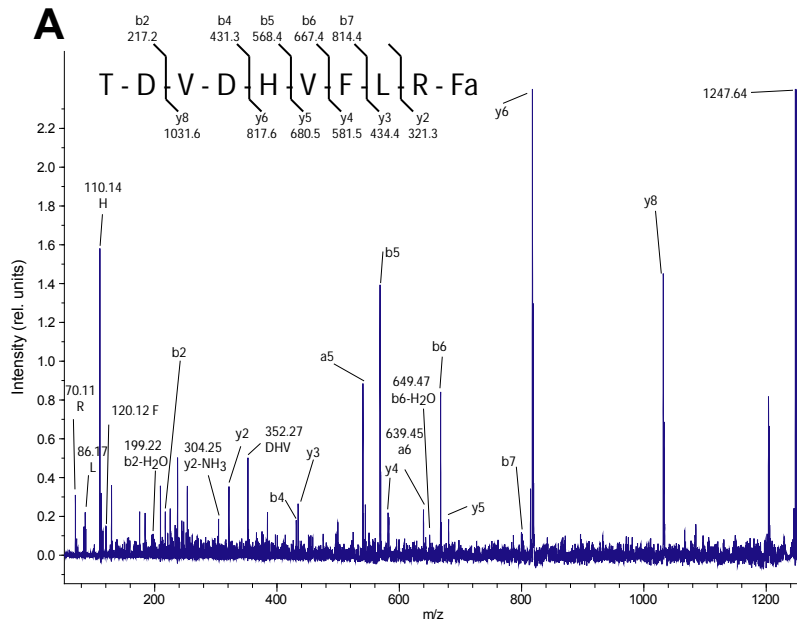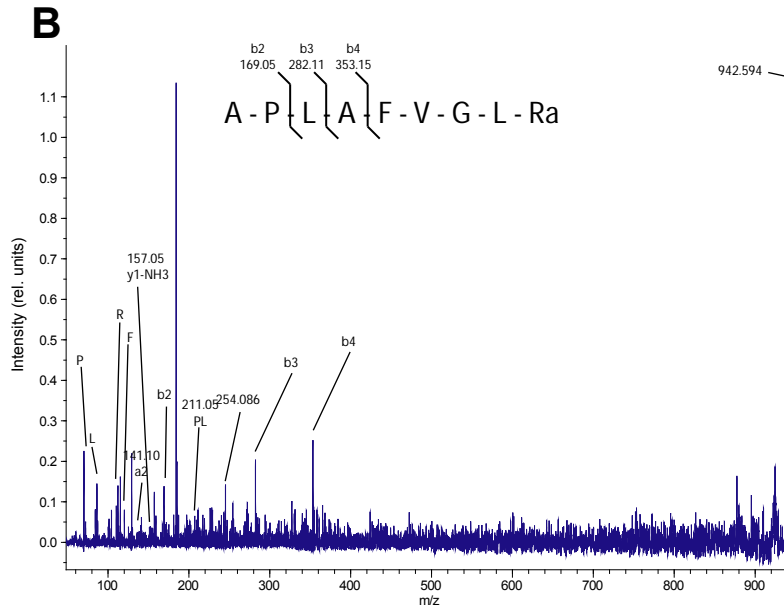

**Supplementary figure 1.** MALDI TOF/TOF MS analysis of two selected ions with  $m/z$  1247.6 (A) and  $m/z$  942.6 (B) found in extract from *dimm* (*c929*)-GAL4 enriched cells. Complementary sequence information resulting from ion fragmentation with retention of charge at the N-terminal (b-ions) or C-terminal (y-ions) side of the peptide bond were found showing an almost complete series for the  $m/z$  1247.6 ion. The amino acid sequence deduced is consistent with that of Dromyosuppressin. The tandem mass spectrum obtained from the precursor ion at  $m/z$  942.6 contains 3 b-ions consistent with the sequence of Tachykinin-like peptide. The fragments are labeled according to the nomenclature of Biemann<sup>97</sup>.

**Supplementary table 1.** The theoretical and observed monoisotopic m/z ratios of protonated peptides [M+H]<sup>+</sup> identified in adult *Drosophila melanogaster* brain extract by on-line LC-ESI-Q-TOF CID tandem MS and/or off-line HPLC accurate mass MALDI-FTMS measurement.

| Peptide sequence <sup>a</sup> | ESI-Q-TOF MS            |                |              |                                             |                 |                                                    | MALDI-FTMS <sup>c</sup> |
|-------------------------------|-------------------------|----------------|--------------|---------------------------------------------|-----------------|----------------------------------------------------|-------------------------|
|                               | LC retention time (min) | Precursor ions |              | Monoisotopic Mass of [M+H] <sup>+</sup> ion |                 | Mascot Score or PepSeq identification <sup>b</sup> |                         |
|                               |                         | m/z            | charge state | Measured m/z                                | Theoretical m/z |                                                    |                         |
| DQWQKLHGGWa                   | n/d                     | n/d            | n/d          | n/d                                         | n/d             | -                                                  | +                       |
| pQTFQYSRGWTNa                 | n/d                     | n/d            | n/d          | n/d                                         | n/d             | -                                                  | +                       |
| AAMDRYa                       | 31.64                   | 725.41         | 1            | 725.42                                      | 725.34          | PepSeq                                             | n/d                     |
| PQRLRWa                       | 23.44                   | 854.51         | 1            | 854.51                                      | 854.51          | PepSeq                                             | n/d                     |
| LPVYNFGLa                     | 34.10                   | 921.55         | 1            | 921.55                                      | 921.52          | PepSeq                                             | n/d                     |
| SVPFKPRLa                     | 23.79                   | 942.69         | 1            | 942.70                                      | 942.59          | PepSeq                                             | n/d                     |
| APNGFLGMRa                    | 35.19                   | 481.14         | 2            | 961.51                                      | 961.27          | PepSeq                                             | +                       |
| SPSLRLRFa                     | 27.32                   | 487.81         | 2            | 974.61                                      | 974.59          | PepSeq                                             | +                       |
| KPMRLRWa                      | 20.79                   | 985.41         | 1            | 985.41                                      | 985.59          | PepSeq                                             | n/d                     |
| SAPQDFVRSa                    | 35.44                   | 503.23         | 2            | 1005.45                                     | 1005.55         | PepSeq                                             | n/d                     |
| PKQDFMRFa                     | 28.59                   | 534.33         | 2            | 1067.65                                     | 1067.62         | PepSeq                                             | n/d                     |
| APVNSFVGMRa                   | 25.82                   | 538.85         | 2            | 1076.69                                     | 1076.57         | PepSeq                                             | +                       |
| TDVDHVFLR                     | 26.32                   | 551.32         | 2            | 1101.64                                     | 1101.57         | 30                                                 | n/d                     |
| TPAEDFMRFa                    | 36.95                   | 556.69         | 2            | 1112.37                                     | 1112.52         | 24.6                                               | n/d                     |
| pQLTFSPDWGK                   | 35.05                   | 1161.53        | 1            | 1161.53                                     | 1161.56         | PepSeq                                             | +                       |
| DPKQDFMRFa                    | 30.11                   | 591.73         | 2            | 1182.45                                     | 1182.57         | PepSeq                                             | n/d                     |
| FDDYGHMRFa                    | 27.91                   | 593.74         | 2            | 1186.46                                     | 1186.51         | 55                                                 | n/d                     |
| FDDYGHMoRFa                   | 23.92                   | 601.79         | 2            | 1202.58                                     | 1202.51         | PepSeq                                             | n/d                     |
| WFGDVNQKPI                    | 31.88                   | 602.26         | 2            | 1203.52                                     | 1203.62         | PepSeq                                             | +                       |
| SDPDMLNSIVE                   | 28.51                   | 1219.61        | 1            | 1219.62                                     | 1219.55         | PepSeq                                             | n/d                     |
| TDVDHVFLRFa                   | 29.68                   | 624.32         | 2            | 1247.64                                     | 1247.66         | 74                                                 | +                       |
| LTKAQGDFNEF                   | 28.25                   | 635.31         | 2            | 1269.60                                     | 1269.61         | PepSeq                                             | n/d                     |
| TTRPQPFNFGLa                  | 30.10                   | 638.88         | 2            | 1276.76                                     | 1276.68         | PepSeq                                             | +                       |
| FAQYRPTSYSA                   | 25.39                   | 645.71         | 2            | 1290.42                                     | 1290.61         | PepSeq                                             | n/d                     |
| YIGSLARAGGLMT                 | 31.35                   | 655.31         | 2            | 1309.62                                     | 1309.70         | PepSeq                                             | n/d                     |
| YRKPPFNGSIFa                  | 29.66                   | 662.89         | 2            | 1324.77                                     | 1324.72         | 20                                                 | n/d                     |
| AYRKPPFNGSIFa                 | 29.72                   | 698.41         | 2            | 1395.81                                     | 1395.76         | -                                                  | +                       |
| NLGALKSSPVHGVQ                | 24.42                   | 703.9          | 2            | 1406.80                                     | 1406.78         | 47                                                 | n/d                     |
| SVAALAAQGLLNAPK               | 33.62                   | 712.43         | 2            | 1423.85                                     | 1423.83         | 70                                                 | +                       |
| GPSASSGLWFGPRLa               | 35.03                   | 715.93         | 2            | 1430.86                                     | 1430.76         | 62                                                 | +                       |
| YIGSLARAGGLMTYa               | 28.54                   | 736.32         | 2            | 1471.63                                     | 1471.78         | 20                                                 | n/d                     |
| YLRSPTYGNVNEL                 | 29.68                   | 763.24         | 2            | 1525.48                                     | 1525.77         | PepSeq                                             | n/d                     |
| TGPSASSGLWFGPRLa              | 45.77                   | 766.43         | 2            | 1531.86                                     | 1531.80         | -                                                  | +                       |
| NLGALKSSPVHGVQQ               | 24.17                   | 767.95         | 2            | 1534.89                                     | 1534.84         | 47                                                 | n/d                     |
| RQAQGWNKFRGAWa                | 43.15                   | 802.48         | 2            | 1603.95                                     | 1603.84         | -                                                  | +                       |
| NVGTLARDFQLPIPNa              | 36.63                   | 827.53         | 2            | 1654.06                                     | 1653.91         | PepSeq                                             | +                       |
| GGDDQFDDYGHMRFa               | 29.69                   | 829.93         | 2            | 1658.46                                     | 1658.67         | 53                                                 | n/d                     |
| GTVLIQTDNTQYIRTa              | 28.56                   | 861.36         | 2            | 1721.71                                     | 1721.92         | PepSeq                                             | n/d                     |
| NSVVLGKQRFHSHWGa              | 37.51                   | 871.61         | 2            | 1742.21                                     | 1741.96         | PepSeq                                             | n/d                     |
| EESNPAQEFLTKAQGDF             | 37.26                   | 955.91         | 2            | 1910.81                                     | 1910.88         | PepSeq                                             | n/d                     |
| NSELINSLSLPKNMNDAa            | 38.16                   | 986.53         | 2            | 1972.02                                     | 1972.06         | PepSeq                                             | n/d                     |
| EESNPAQEFLTKAQGDFNEF          | 40.03                   | 1150.85        | 2            | 2300.70                                     | 2301.03         | PepSeq                                             | n/d                     |

<sup>a</sup>Previously unreported peptides and fragments are labeled in boldface; <sup>b</sup>Peptide identifications were made either with Mascot Search (scores are provided), manual and automatic matching using PepSeq, or exact mass measurements with FTMS (indicated by -); <sup>c</sup> +: detected in extract; n/d: not detected.

**Supplementary table 2.** The theoretical and observed monoisotopic m/z values of protonated peptides identified using MALDI-TOF MS analysis of extract or acetylated extract enriched from adult *D. melanogaster* expressing either *dim* (*c929*)-GAL4 or *Ddc*-GAL4 with UAS-*mCD8-GFP*.

| Predicted peptide sequence | Calculated mass of [M+H] <sup>+</sup> ion <sup>a</sup> | Observed mass of [M+H] <sup>+</sup> ion |                                  |                                      |                                      |
|----------------------------|--------------------------------------------------------|-----------------------------------------|----------------------------------|--------------------------------------|--------------------------------------|
|                            |                                                        | <i>dim</i> - GAL4 enriched cells        | <i>Ddc</i> - GAL4 enriched cells | <i>dim</i> - GAL4 acetylated extract | <i>Ddc</i> - GAL4 acetylated extract |
| SRPYSFGLa                  | 925.49                                                 | 925.83                                  |                                  | 967.68                               |                                      |
| SVPFKPRLa                  | 942.59                                                 | 942.72                                  | 942.98                           | 1026.76                              | 1082.04                              |
| APLAFVGLRa                 | 942.59                                                 | 942.72                                  | 942.98                           | 984.80                               | 984.94                               |
| PFCNAFTGCa                 | 958.39                                                 | 958.37                                  |                                  |                                      |                                      |
| APNGFLGMRa                 | 961.50                                                 | 961.91                                  |                                  | 1002.92                              |                                      |
| SPSLRLRFa                  | 974.59                                                 | 974.65                                  | 974.93                           | 1016.76                              | 1016.97                              |
| KPQRLRWa                   | 982.61                                                 | 982.60                                  | 982.91                           | 1066.80                              | 1066.03                              |
| KPMRLRWa                   | 985.59                                                 | 985.64                                  | 985.96                           | 1069.80                              | 1069.96                              |
| APTSSFIGMR                 | 1065.55                                                | 1065.81                                 | 1065.79                          | 1107.71                              | 1107.91                              |
| APVNSFVGMRa                | 1076.58                                                | 1076.72                                 |                                  |                                      |                                      |
| DPKQDFMRFa                 | 1182.57                                                | 1182.61                                 | 1182.62                          | 1266.67                              | 1266.93                              |
| TDVDHVFLRFa                | 1247.65                                                | 1247.62                                 | 1247.64                          | 1289.78                              | 1289.99                              |
| TTRPQPFNGLa                | 1276.68                                                | 1276.61                                 | 1276.57                          | 1318.82                              | 1319.01                              |
| FDDyGHmRFa                 | 1282.47                                                | 1282.64                                 | 1282.53                          | 1324.79                              | 1324.99                              |
| GANMGLYAFPRFa              | 1294.67                                                | 1294.60                                 |                                  |                                      |                                      |
| AQRSPSLRLRFa               | 1329.79                                                | 1329.69                                 |                                  | 1371.90                              |                                      |
| qTFQYSRGWNa                | 1369.63                                                | 1369.56                                 |                                  | 1369.73                              |                                      |
| AYRKPPFNGSIFa              | 1395.75                                                | 1395.68                                 | 1395.42                          | 1479.85                              | 1480.11                              |
| SVAALAAQGLLNAPK-OH         | 1423.84                                                | 1423.72                                 |                                  | 1507.92                              |                                      |
| GPSASSGLWFGPRLa            | 1430.75                                                | 1430.62                                 |                                  | 1472.87                              |                                      |
| YIGSLARAGGLMTYa            | 1471.77                                                | 1471.66                                 | 1471.28                          | 1513.83                              | 1514.10                              |
| TGPSASSGLWFGPRLa           | 1531.80                                                | 1532.04                                 |                                  | 1574.82                              |                                      |
| RQAQGWNKFRGAWa             | 1603.84                                                | 1603.74                                 | 1603.15                          | 1687.96                              | 1688.17                              |
| NVGTLARDFQLPIPNa           | 1653.91                                                | 1653.73                                 | 1653.14                          | 1695.92                              | 1696.21                              |
| IDLSRLYGHMANPIV-OH         | 1698.90                                                | 1698.87                                 | 1699.07                          | 1740.90                              | 1741.18                              |
| GGDDQFDDyGHMRF             | 1738.63                                                | 1738.40                                 |                                  | 1780.91                              |                                      |
| qVRYRQCYFNPISCF-OH         | 1906.87                                                | 1904.56 <sup>^</sup>                    | 1904.58 <sup>^</sup>             | 1904.84 <sup>^</sup>                 | 1905.16 <sup>^</sup>                 |
| QVRYRQCYFNPISCF-OH         | 1923.90                                                | 1921.58 <sup>^</sup>                    | 1921.62 <sup>^</sup>             | 1963.88 <sup>^</sup>                 | 1964.14 <sup>^</sup>                 |
| NSELINSLLSLPKNMNDa         | 1972.02                                                | 1971.86                                 | 1972.02                          | *                                    | *                                    |

<sup>a</sup>Monoisotopic mass. m: oxidized Met residue; q: pyroglutamic acid; y: sulfated Tyr; <sup>^</sup>: The difference of 2 Da between the theoretical and observed m/z values is accounted for by the presence of a disulfide bond formed between the Cys residues; \*: neither the original nor the derivatized form of the ion was observed following acetylation.

**Supplementary table 3.** The theoretical and observed monoisotopic  $m/z$  values of protonated peptides found in the extract from the *dimm (c929)*-GAL4 line using off-line HPLC MALDI FTMS analysis.

| Peptide sequence | Monoisotopic mass                         |                                         |
|------------------|-------------------------------------------|-----------------------------------------|
|                  | Calculated mass of [M+H] <sup>+</sup> ion | Observed mass of [M+H] <sup>+</sup> ion |
| SPSLRLRFa        | 974.59                                    | 974.55                                  |
| DPKQDFMRFa       | 1182.57                                   | 1182.55                                 |
| TDVDHVFLRFa      | 1247.65                                   | 1247.64                                 |
| TTRPQPFNFGLa     | 1276.68                                   | 1276.68                                 |
| AYRKPPFNGSIFa    | 1395.75                                   | 1395.77                                 |
| GPSASSGLWFGPRLa  | 1430.75                                   | 1430.78                                 |
| YIGSLARAGGLMTYa  | 1471.77                                   | 1471.79                                 |
| TGPSASSGLWFGPRLa | 1531.80                                   | 1531.85                                 |
| NVGTLARDFQLPIPNa | 1653.91                                   | 1653.96                                 |
